# Supplementary material for: Use of a Dynamic Genetic Testing Approach for Childhood-Onset Epilepsy
Source: PubMed Central journal article supplement (PMC6481455; doi:10.1001/jamanetworkopen.2019.2129), 2019-04-12
Supplement: jamanetwopen-2-e192129-s001.pdf [file jamanetwopen-2-e192129-s001.pdf]

## Supplementary Online Content

Balciuniene J, DeChene ET, Akgumus G, et al. Use of a dynamic genetic testing approach for childhood-onset epilepsy. *JAMA Netw Open*. 2019;2(4):e192129. doi:10.1001/jamanetworkopen.2019.2129

**eMethods 1.** Sequence Coverage Assessment, Sanger Sequencing Fill-Ins and CNV Confirmation

**eMethods 2.** Rapid Epilepsy Sequence and Deletion/Duplication (STAT) Panel

**eReference.**

**eTable.** Gene Identification Numbers

This supplementary material has been provided by the authors to give readers additional information about their work.

## **eMethods 1. Sequence Coverage Assessment, Sanger Sequencing Fill-Ins and CNV Confirmation**

The sequence coverage of the exonic sequences ( $\pm 15$  intronic bp) of the 100 panel genes was assessed using the BamStats04 tool and GATK DepthOfCoverage. A base pair with at least 10 sequencing reads was considered “fully” covered. Exons with 10 or more consecutive bases covered by  $< 10X$  were filled-in using Sanger sequencing<sup>1</sup>. Sanger sequencing was also used for technically challenging regions (polyalanine tract expansion in *ARX*) and to confirm all pathogenic and likely pathogenic variants, and variants of uncertain significance (VUS) with low quality metrics as determined by the bioinformatics pipeline. CNVs involving the epilepsy panel genes were confirmed by droplet digital PCR (ddPCR) or another methodology before reporting. CNVs that did not include an epilepsy panel gene were filtered out by the pipeline.

## **eMethods 2. Rapid Epilepsy Sequence and Deletion/Duplication (STAT) Panel**

The rapid epilepsy panel includes sequencing and copy number analysis of 19 epilepsy-associated medically actionable genes. Coding regions and splice sites of those genes were captured using the SureSelectQXT Target Enrichment System (Agilent Inc) followed by NGS. Further processing of the NGS data was performed using in-house bioinformatics pipeline that uses the same tools as described above.

Copy number analysis for those genes (except *GRIN2D* and *KCNT1*) was performed using targeted analysis from a custom comparative genomic hybridization array (aCGH) (Agilent Technologies) following the manufacturer's protocol. The array includes 4 probes on average for each targeted exon and one probe every 30 kb throughout the rest of the genome.

Genes included in this panel are: *ALDH7A1*, *CSTB*, *EPM2A*, *GAMT*, *GATM*, *GRIN2A*, *GRIN2D*, *GRIN2B*, *KCNB1*, *KCNQ2*, *KCNT1*, *NHLRC1*, *PNPO*, *POLG*, *SCN1A*, *SCN2A*, *SCN8A*, *SLC2A1*, *SLC6A8*.

## **eReference**

1. Niazi R, Gonzalez MA, Balciuniene J, Evans P, Sarmady M, Abou Tayoun AN. The Development and Validation of Clinical Exome-Based Panels Using ExomeSlicer: Considerations and Proof of Concept Using an Epilepsy Panel. *J Mol Diagn.* 2018;20(5):643-652.

## eTable. Gene Identification Numbers

CHOP epilepsy panel genes with OMIM IDs

| Gene Symbol | OMIM ID |
|-------------|---------|
| ALDH7A1     | 107323  |
| ALG13       | 300776  |
| ARHGEF9     | 300429  |
| ARX         | 300382  |
| ASAH1       | 613468  |
| ATP1A2      | 182340  |
| ATP1A3      | 182350  |
| CACNA1A     | 601011  |
| CACNA1D     | 114206  |
| CASK        | 300172  |
| CDKL5       | 300203  |
| CERS1       | 606919  |
| CHD2        | 602119  |
| CHRNA2      | 118502  |
| CHRNA4      | 118504  |
| CHRNA2      | 118507  |
| CLN3        | 607042  |
| CLN5        | 608102  |
| CLN6        | 606725  |
| CLN8        | 607837  |
| CNKSR2      | 300724  |
| CSTB        | 601145  |
| CTSD        | 116840  |
| DEPDC5      | 614191  |
| DNM1        | 602377  |
| DYNC1H1     | 600112  |
| EEF1A2      | 602959  |
| EFHC1       | 608815  |
| EPM2A       | 607566  |
| FOLR1       | 136430  |
| FOXP1       | 164874  |
| GABRA1      | 137160  |
| GABRB3      | 137192  |
| GABRG2      | 137164  |
| GNAO1       | 139311  |
| GOSR2       | 604027  |

|          |        |
|----------|--------|
| GRIN1    | 138249 |
| GRIN2A   | 138253 |
| GRIN2B   | 138252 |
| HCN1     | 602780 |
| HDAC4    | 605314 |
| HNRNPU   | 602869 |
| IQSEC2   | 300522 |
| KCNA1    | 176260 |
| KCNA2    | 176262 |
| KCNB1    | 600397 |
| KCNC1    | 176258 |
| KCNJ10   | 602208 |
| KCNQ2    | 602235 |
| KCNQ3    | 602232 |
| KCNT1    | 608167 |
| KCTD7    | 611725 |
| LGI1     | 604619 |
| MECP2    | 300005 |
| MEF2C    | 600662 |
| MFSD8    | 611124 |
| NHLRC1   | 608072 |
| PCDH19   | 300460 |
| PIGA     | 311770 |
| PIGO     | 614730 |
| PIGT     | 610272 |
| PLCB1    | 607120 |
| PNKP     | 605610 |
| PNPO     | 603287 |
| POLG     | 174763 |
| PPT1     | 600722 |
| PRICKLE1 | 608500 |
| PRRT2    | 614386 |
| PURA     | 600473 |
| QARS     | 603727 |
| RELN     | 600514 |
| RYR3     | 180903 |
| SCARB2   | 602257 |
| SCN1A    | 182389 |
| SCN1B    | 600235 |
| SCN2A    | 182390 |
| SCN8A    | 600702 |

|          |        |
|----------|--------|
| SIK1     | 605705 |
| SLC12A5  | 606726 |
| SLC13A5  | 608305 |
| SLC25A22 | 609302 |
| SLC2A1   | 138140 |
| SLC35A2  | 314375 |
| SLC6A1   | 137165 |
| SLC6A8   | 300036 |
| SPTAN1   | 182810 |
| ST3GAL3  | 606494 |
| STX1B    | 601485 |
| STXBP1   | 602926 |
| SYN1     | 313440 |
| SYNGAP1  | 603384 |
| SZT2     | 615463 |
| TBC1D24  | 613577 |
| TPP1     | 607998 |
| TSC1     | 605284 |
| TSC2     | 191092 |
| UBE3A    | 601623 |
| WDR45    | 300526 |
| WWOX     | 605131 |
| ZEB2     | 605802 |
